# Supplementary material for: Synthesis and biochemical evaluation of two novel N-hydroxyalkylated cyclosporin A analogs
Source: Royal Society of Chemistry journal article supplement (doi:10.1039/c8ob00980e), 2018-01-01
Supplement: c8ob00980e1.pdf [file c8ob00980e1.pdf]

## **Supplementary Information**

Synthesis and biochemical evaluation of two novel N-hydroxyalkylated  
cyclosporin A analogs

Viktoría Kahlert, Erik Prell, Oliver Ohlenschläger, Jelena Melesina, Michael Schumann,  
Christian Lücke, Gunter Fischer and Miroslav Malešević

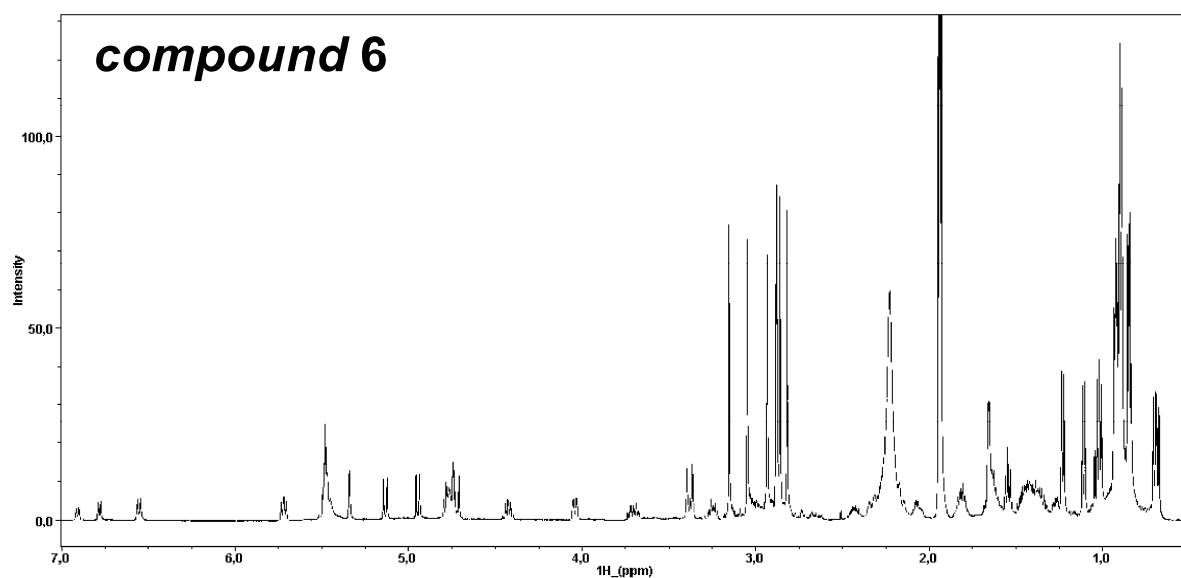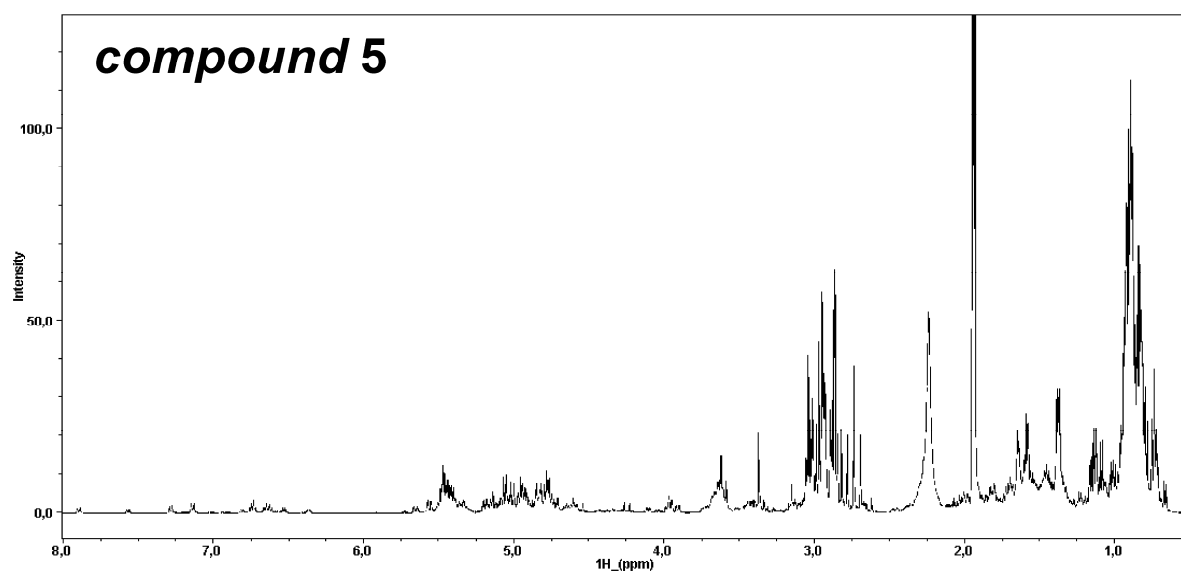

**Figure S1:** One-dimensional  $^1\text{H}$ -NMR spectra of compounds **6** (upper panel) and **5** (lower panel) in  $\text{CD}_3\text{CN}$ . (Figure produced with NMRViewJ from One Moon Scientific.)

**Table S1:** <sup>1</sup>H- and <sup>13</sup>C resonance assignments of compound **6** at 25 °C in CD<sub>3</sub>CN:

| residue | NH/NCH <sub>3</sub> | CO    | CαH             | CβH             | CγH        | CδH             | CεH         | CζH         | CηH        |
|---------|---------------------|-------|-----------------|-----------------|------------|-----------------|-------------|-------------|------------|
| MeBmt1  | 2.93(35.3)          | 171.8 | 5.34(59.1)      | 4.04(76.9)      | 1.44(36.8) | 2.33/2.07(36.7) | 5.48(129.7) | 5.48(127.7) | 1.65(18.2) |
|         |                     |       |                 |                 | 0.83(15.8) |                 |             |             |            |
| Abu2    | 6.78(-)             | 175.5 | 4.76(53.1)      | 1.80/1.63(24.6) | 1.03(10.8) |                 |             |             |            |
| Sar3    | 3.15(37.4)          | 169.2 | 4.73/3.38(51.1) |                 |            |                 |             |             |            |
| MeLeu4  | 2.82(29.5)          | 172.0 | 5.72(51.2)      | 1.65/1.47(38.9) | 1.38(25.3) | 0.92(23.3)      |             |             |            |
|         |                     |       |                 |                 |            | 0.89(23.1)      |             |             |            |
| Val5    | 3.38/3.24(61.8)     |       |                 |                 |            |                 |             |             |            |
|         | 3.70/3.01(45.0)     | 173.9 | 5.13(58.6)      | 2.43(27.9)      | 0.85(20.4) |                 |             |             |            |
|         |                     |       |                 |                 | 0.68(18.1) |                 |             |             |            |
| MeLeu6  | 2.86(30.9)          | 170.6 | 4.79(55.4)      | 1.81/1.41(36.4) | 1.41(25.5) | 0.91(23.2)      |             |             |            |
|         |                     |       |                 |                 |            | 0.91(22.8)      |             |             |            |
| Ala7    | 6.55(-)             | 172.3 | 4.42(48.3)      | 1.11(17.4)      |            |                 |             |             |            |
| D-Ala8  | 6.90(-)             | 173.4 | 4.74(45.8)      | 1.23(16.9)      |            |                 |             |             |            |
| MeLeu9  | 2.88(30.5)          | 172.2 | 5.48(52.6)      | 1.54(38.5)      | 1.35(25.2) | 0.89(23.4)      |             |             |            |
|         |                     |       |                 |                 |            | 0.89(22.7)      |             |             |            |
| MeLeu10 | 3.04(32.4)          | 173.6 | 5.46(52.6)      | 2.17/1.26(38.6) | 1.62(25.6) | 1.01(24.2)      |             |             |            |
|         |                     |       |                 |                 |            | 0.92(21.2)      |             |             |            |
| MeVal11 | 2.88(30.5)          | 171.7 | 4.94(59.2)      | 2.27(27.1)      | 0.85(20.3) |                 |             |             |            |
|         |                     |       |                 |                 | 0.70(18.3) |                 |             |             |            |

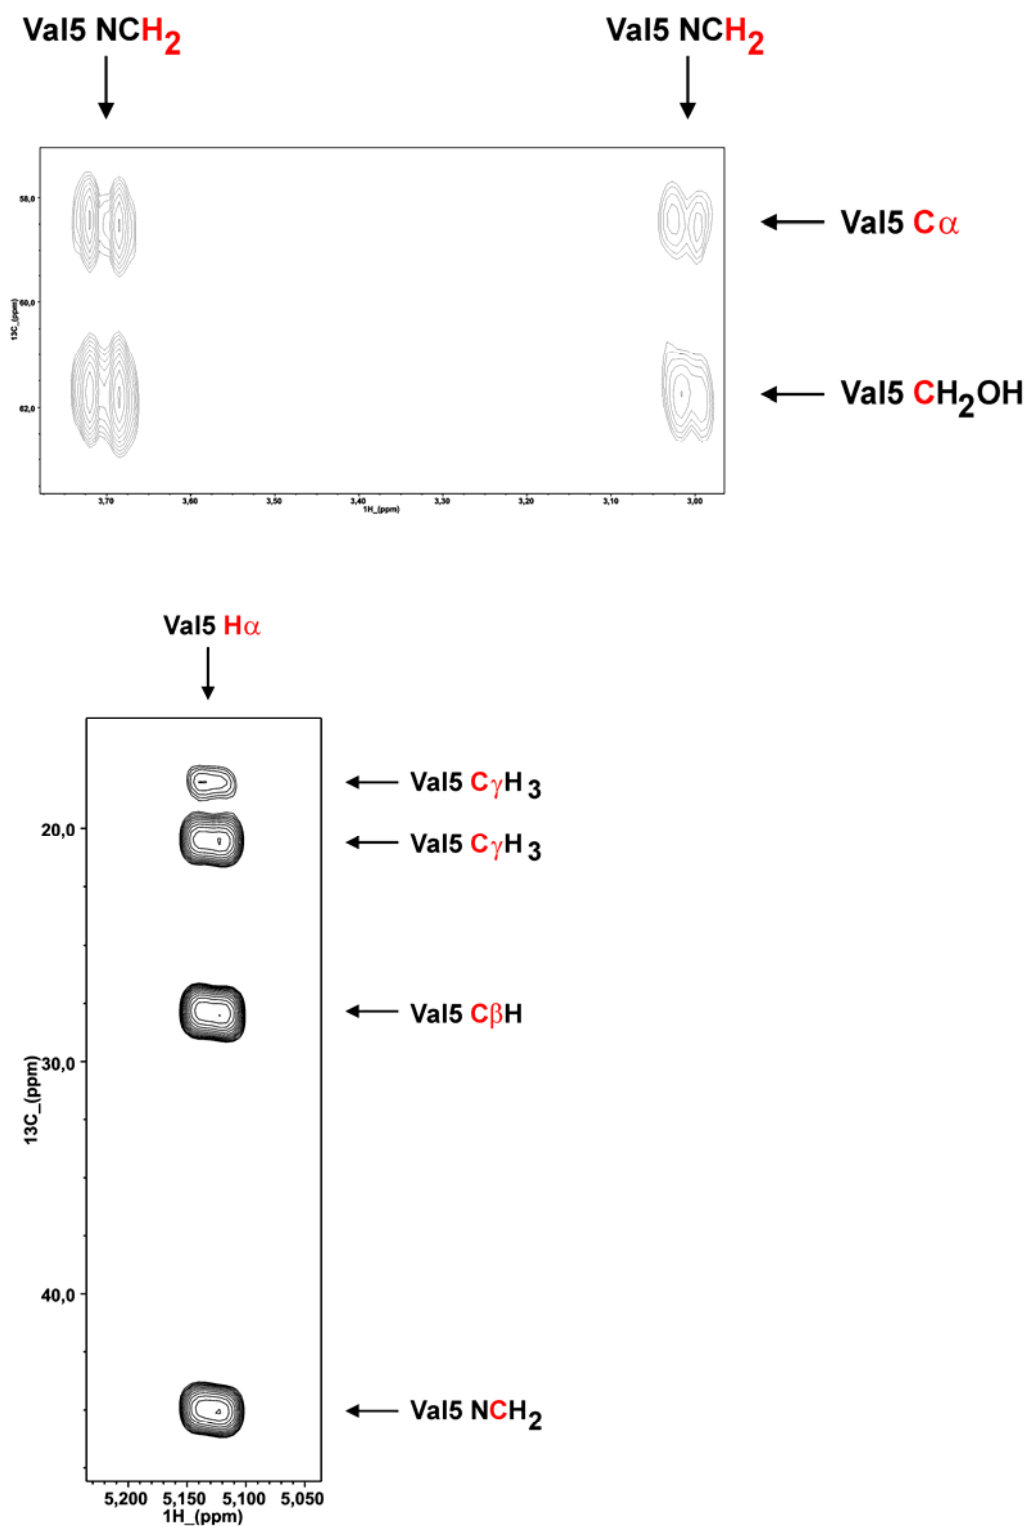

**Figure S2:** Segments from the  $^1\text{H}/^{13}\text{C}$ -HMBC spectrum of compound **6**, showing the scalar through-bond connectivities i) of the methylene protons in the ethoxy moiety attached to the Val5 nitrogen atom (upper panel) and ii) of the Val5  $\text{C}\alpha$  proton (lower panel). (Figure produced with NMRViewJ from One Moon Scientific.)

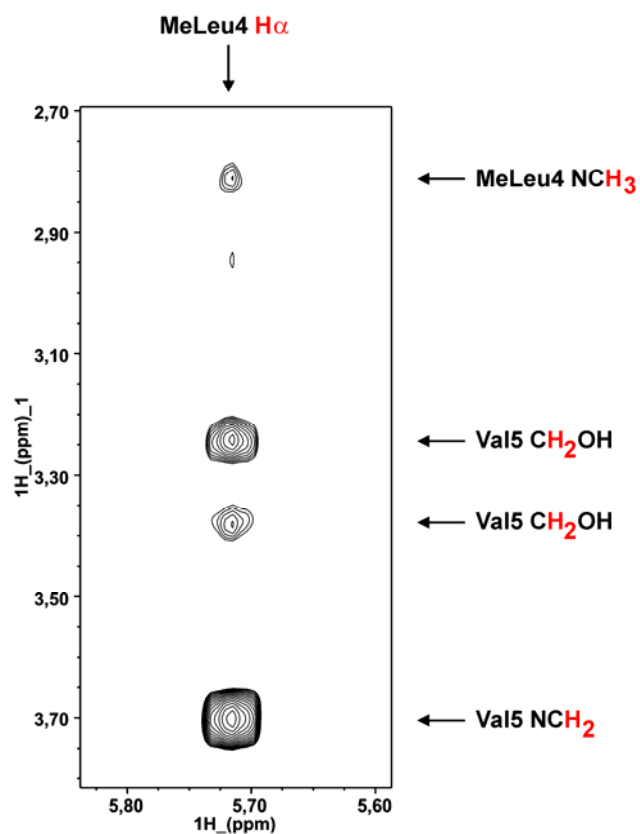

**Figure S3:** Segments from the  $^1\text{H}/^1\text{H}$ -ROESY spectrum of compound **6**, showing the dipolar through-space connectivities of the MeLeu4  $\text{C}\alpha$  proton with the protons of the ethoxy moiety attached to the Val5 nitrogen atom. (Figure produced with NMRViewJ from One Moon Scientific.)

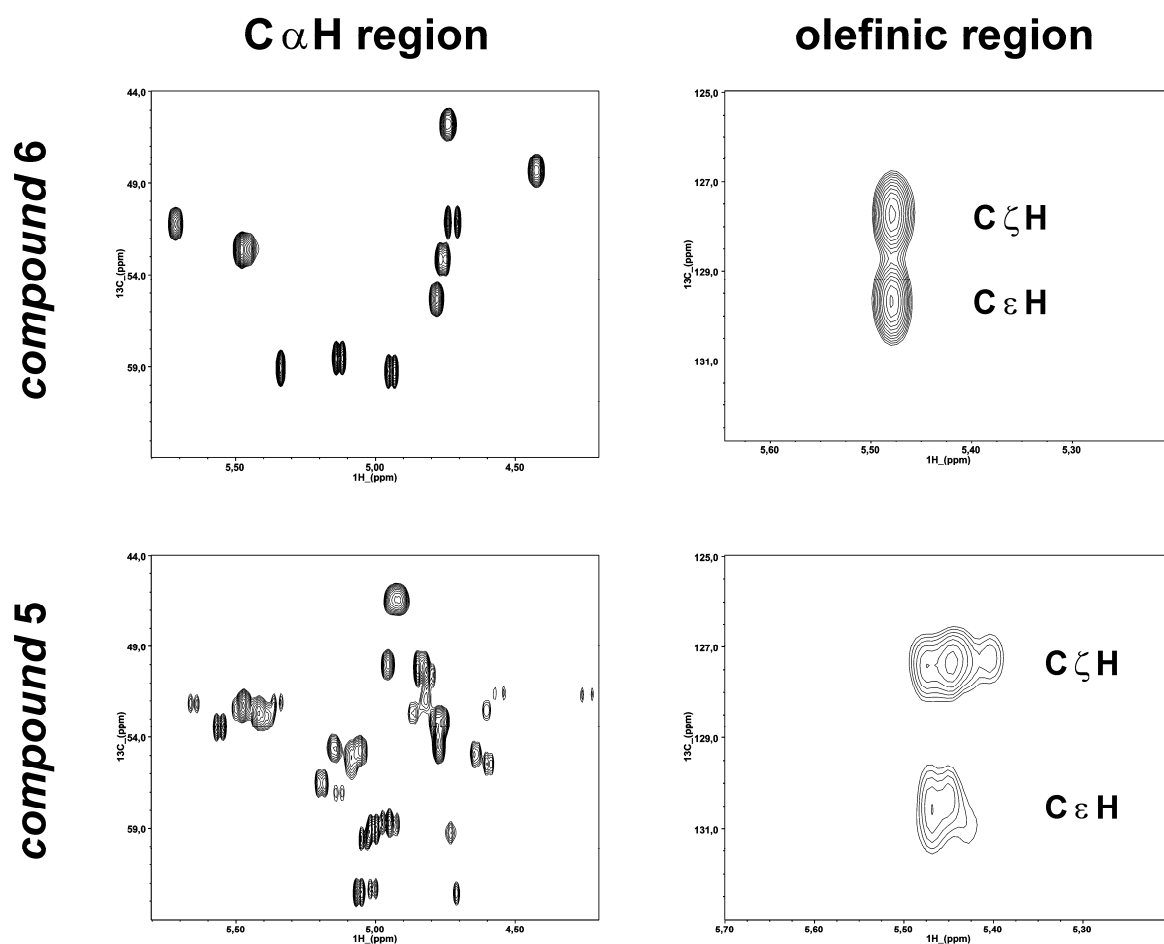

**Figure S4:** Sections from the two-dimensional  $^1\text{H}/^{13}\text{C}$ -HSQC spectra of compounds **6** (upper panels) and **5** (lower panels). The panels on the left show the C $\alpha$ H region, characterized by 11 peaks in case of compound **6** (the Sar3 H $\alpha$  resonance at 3.38 ppm is not shown in this plot), whereas the same region in the spectrum of compound **5** displays a considerably larger number of signals. The panels on the right show another example of this heterogeneity of  $^1\text{H}$  resonances in case of the two olefinic protons (C $\epsilon$ H and C $\zeta$ H) of the MeBmt1 residue. (Figure produced with NMRViewJ from One Moon Scientific.)

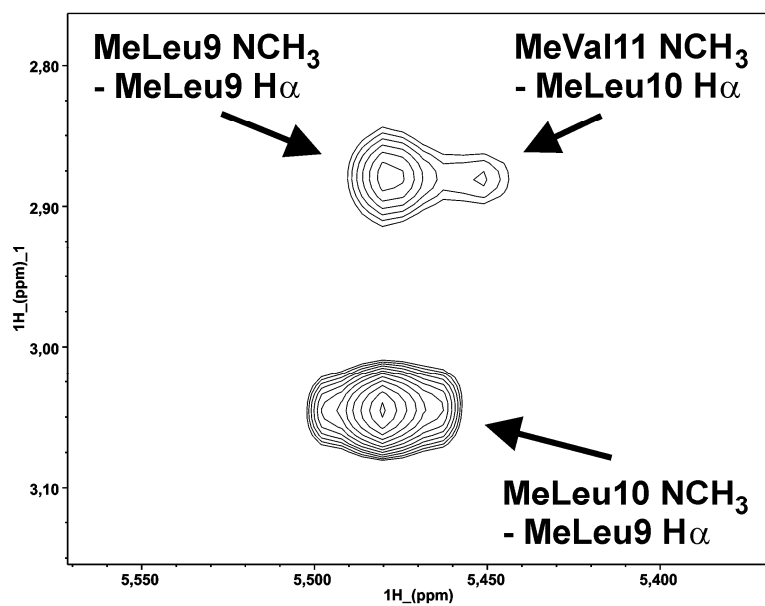

**Figure S5:** Segment from the  $^1\text{H}/^1\text{H}$ -ROESY spectrum of compound **6** showing among others the very strong sequential ROE signal between MeLeu9 H $\alpha$  and MeLeu10 NCH<sub>3</sub>. (Figure produced with NMRViewJ from One Moon Scientific.)

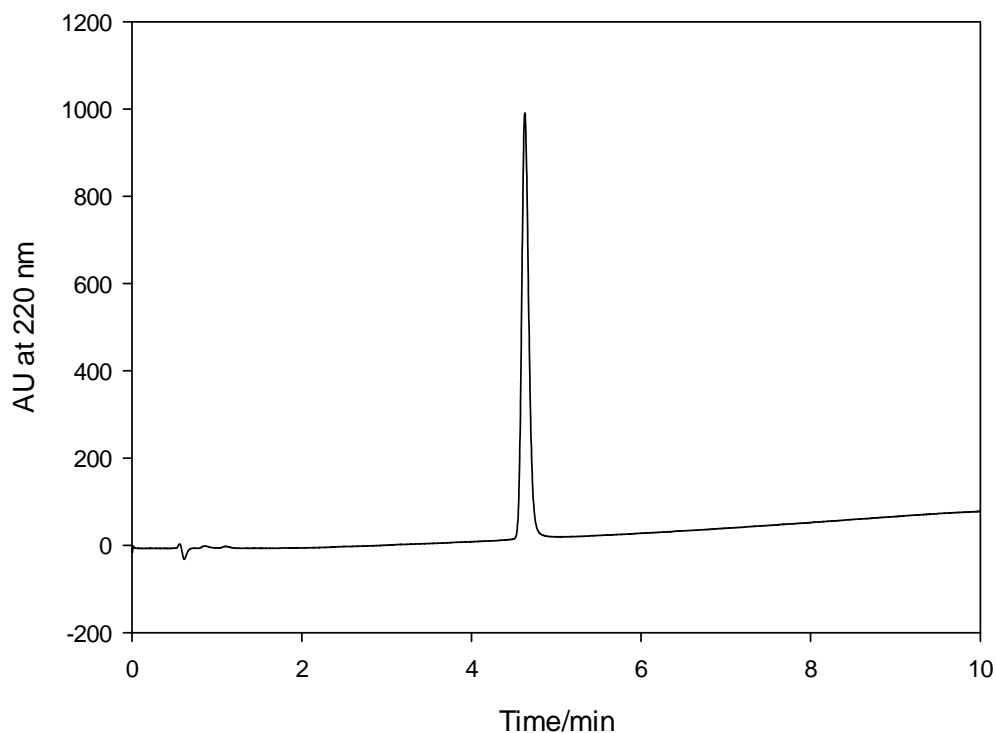

**Figure S6:** HPLC chromatogram of purified compound **5**  $R_t = 4.6$  min (solvent A  $H_2O$ , solvent B acetonitrile, RP C8, 50.00 x 4.60 mm. Method: 40 °C, 50 – 100 % B in 10 min, flow 1 mL/min).

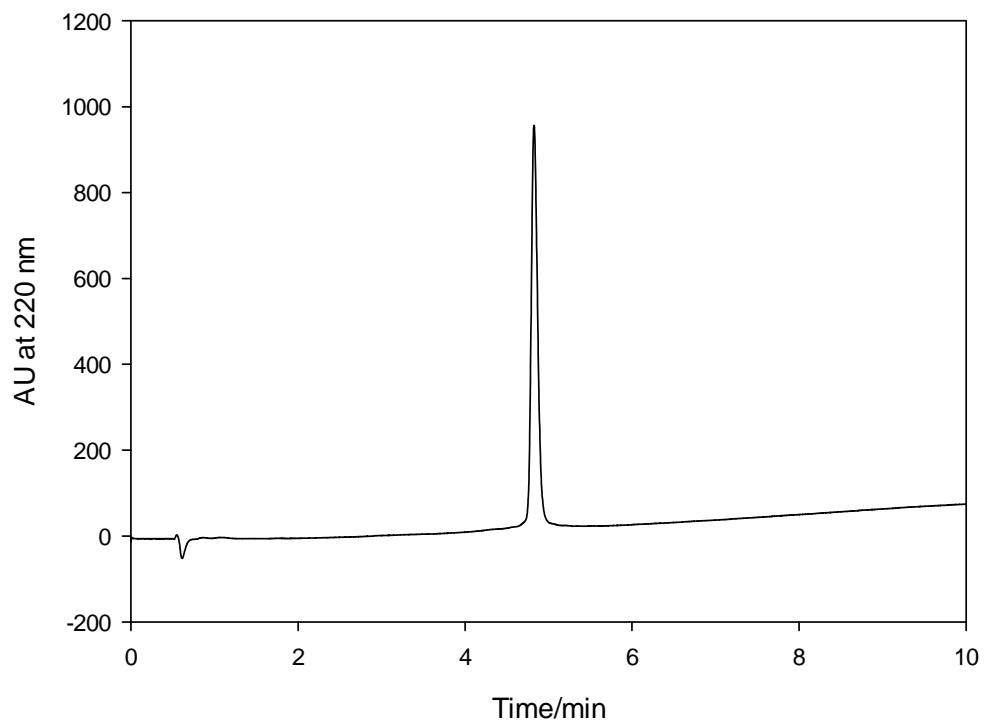

**Figure S7:** HPLC chromatogram of purified compound **6**  $R_t = 4.8$  min (solvent A  $H_2O$ , solvent B acetonitrile, RP C8, 50.00 x 4.60 mm. Method: 40 °C, 50 – 100 % B in 10 min, flow 1 mL/min).
